# Supplementary material for: A multimodal virtual vision platform as a next-generation vision system for a surgical robot
Source: Springer Nature journal article supplement (doi:10.1007/s11517-024-03030-1), 2024-02-02
Supplement: 11517_2024_3030_MOESM1_ESM.pdf [file 11517_2024_3030_MOESM1_ESM.pdf]

## Supplementary Materials

**Table A** Detailed results of the ring transfer task when using the stereo viewer in the novice group

| No. | Indicator      | Number of Ring |       |       |       |       |        |       |       |       |       |       | Success rate (%) | Time for transferring a ring |       |
|-----|----------------|----------------|-------|-------|-------|-------|--------|-------|-------|-------|-------|-------|------------------|------------------------------|-------|
|     |                | 1              | 2     | 3     | 4     | 5     | 6      | 7     | 8     | 9     | 10    | 11    |                  | Mean                         | SD    |
| 1   | Success / Fail | S              | S     | S     | S     | F     | S      | S     | F     | S     | F     | S     | 72.73            | 27.26                        | 12.21 |
|     | Time           | 26.56          | 22.62 | 22.20 | 56.73 | 23.86 | 24.35  | 26.30 | 58.05 | 18.70 | 13.46 | 20.59 |                  |                              |       |
| 2   | Success / Fail | F              | S     | S     | F     | S     | S      | S     | F     | F     | S     | S     | 63.64            | 53.11                        | 9.90  |
|     | Time           | 45.27          | 69.44 | 57.27 | 16.69 | 46.72 | 46.37  | 44.05 | 34.81 | 37.67 | 50.06 | 64.62 |                  |                              |       |
| 3   | Success / Fail | S              | F     | S     | S     | S     | S      | S     | S     | S     | S     | S     | 90.91            | 64.21                        | 24.89 |
|     | Time           | 63.85          | 23.21 | 84.23 | 84.17 | 69.95 | 102.82 | 39.91 | 61.00 | 77.97 | 29.64 | 28.60 |                  |                              |       |
| 4   | Success / Fail | S              | F     | S     | F     | S     | S      | S     | S     | S     | F     | S     | 72.73            | 50.42                        | 18.11 |
|     | Time           | 52.32          | 7.10  | 26.90 | 26.30 | 39.49 | 75.20  | 56.74 | 29.43 | 49.93 | 18.83 | 73.31 |                  |                              |       |
| 5   | Success / Fail | S              | S     | S     | S     | S     | S      | S     | S     | S     | S     | S     | 100.00           | 49.03                        | 12.57 |
|     | Time           | 40.31          | 52.50 | 37.58 | 54.13 | 22.67 | 52.94  | 62.44 | 51.35 | 68.84 | 43.47 | 53.11 |                  |                              |       |
| 6   | Success / Fail | S              | S     | S     | F     | S     | S      | S     | S     | S     | S     | S     | 90.91            | 25.89                        | 9.35  |
|     | Time           | 32.84          | 23.71 | 26.08 | 25.00 | 35.19 | 31.15  | 14.79 | 11.90 | 20.96 | 41.65 | 20.62 |                  |                              |       |
| 7   | Success / Fail | S              | S     | S     | S     | S     | S      | S     | S     | S     | S     | F     | 90.91            | 42.72                        | 20.37 |
|     | Time           | 37.25          | 66.29 | 86.26 | 37.23 | 32.40 | 48.25  | 46.02 | 24.66 | 30.76 | 18.10 | 14.62 |                  |                              |       |
| 8   | Success / Fail | S              | S     | S     | S     | S     | S      | S     | S     | S     | F     | F     | 81.82            | 69.21                        | 77.17 |
|     | Time           | 34.56          | 35.50 | 44.50 | 48.90 | 64.42 | 273.27 | 32.21 | 39.60 | 49.94 | 27.98 | 18.23 |                  |                              |       |
| 9   | Success / Fail | S              | S     | S     | S     | S     | S      | S     | S     | S     | S     | S     | 100.00           | 29.67                        | 12.58 |
|     | Time           | 21.70          | 22.09 | 23.38 | 28.19 | 27.95 | 39.87  | 13.61 | 21.48 | 26.82 | 57.72 | 43.57 |                  |                              |       |

|    |                |       |       |       |       |       |       |       |       |       |       |       |        |       |       |
|----|----------------|-------|-------|-------|-------|-------|-------|-------|-------|-------|-------|-------|--------|-------|-------|
| 10 | Success / Fail | S     | S     | S     | F     | S     | F     | S     | S     | S     | S     | S     | 81.82  | 25.25 | 8.04  |
|    | Time           | 35.28 | 20.84 | 25.07 | 17.30 | 32.46 | 9.54  | 16.47 | 18.05 | 19.91 | 20.94 | 38.24 |        |       |       |
| 11 | Success / Fail | S     | S     | S     | S     | S     | S     | S     | S     | S     | S     | S     | 100.00 | 20.82 | 4.87  |
|    | Time           | 18.05 | 31.60 | 19.59 | 16.04 | 19.69 | 15.34 | 17.87 | 18.31 | 22.15 | 24.14 | 26.28 |        |       |       |
| 12 | Success / Fail | S     | S     | S     | S     | S     | S     | S     | S     | S     | S     | S     | 100.00 | 25.76 | 9.06  |
|    | Time           | 11.99 | 20.74 | 17.90 | 45.94 | 23.91 | 22.43 | 26.42 | 22.46 | 27.15 | 28.67 | 35.79 |        |       |       |
| 13 | Success / Fail | S     | F     | F     | S     | F     | S     | S     | S     | S     | S     | S     | 72.73  | 24.58 | 11.16 |
|    | Time           | 13.83 | 7.85  | 11.52 | 14.74 | 5.91  | 35.82 | 20.14 | 26.31 | 45.93 | 17.59 | 22.24 |        |       |       |
| 14 | Success / Fail | S     | S     | S     | S     | S     | S     | S     | S     | S     | S     | S     | 100.00 | 31.04 | 7.03  |
|    | Time           | 38.73 | 21.21 | 28.02 | 30.18 | 25.66 | 31.38 | 43.11 | 37.59 | 20.72 | 31.67 | 33.14 |        |       |       |
| 15 | Success / Fail | S     | S     | S     | S     | S     | S     | S     | S     | F     | S     | S     | 90.91  | 25.56 | 11.92 |
|    | Time           | 40.28 | 24.07 | 27.71 | 14.49 | 23.32 | 20.04 | 51.50 | 17.45 | 11.55 | 23.66 | 13.07 |        |       |       |
| 16 | Success / Fail | S     | S     | S     | S     | S     | S     | F     | S     | S     | F     | S     | 81.82  | 49.81 | 17.44 |
|    | Time           | 48.50 | 38.22 | 59.96 | 54.61 | 79.32 | 43.25 | 98.01 | 67.56 | 32.26 | 29.75 | 24.61 |        |       |       |
| 17 | Success / Fail | S     | S     | S     | S     | F     | S     | S     | S     | S     | S     | S     | 90.91  | 30.98 | 11.04 |
|    | Time           | 25.27 | 30.26 | 23.01 | 22.75 | 20.74 | 24.58 | 25.73 | 56.49 | 34.66 | 23.85 | 43.17 |        |       |       |
| 18 | Success / Fail | S     | S     | S     | S     | S     | F     | S     | S     | S     | S     | S     | 90.91  | 24.11 | 3.21  |
|    | Time           | 23.03 | 20.42 | 19.64 | 25.90 | 24.77 | 10.76 | 22.48 | 25.09 | 25.51 | 31.02 | 23.23 |        |       |       |
| 19 | Success / Fail | F     | S     | S     | S     | S     | S     | S     | S     | F     | S     | S     | 81.82  | 40.05 | 12.36 |
|    | Time           | 20.35 | 32.15 | 63.11 | 40.00 | 48.85 | 16.82 | 37.89 | 40.78 | 39.07 | 38.78 | 42.09 |        |       |       |
| 20 | Success / Fail | S     | S     | S     | S     | F     | S     | S     | S     | F     | S     | S     | 81.82  | 30.19 | 6.63  |
|    | Time           | 23.08 | 23.29 | 39.39 | 35.20 | 31.98 | 34.58 | 25.52 | 26.37 | 22.45 | 25.79 | 38.50 |        |       |       |
| 21 | Success / Fail | S     | S     | F     | S     | S     | S     | S     | S     | F     | S     | S     | 81.82  | 21.69 | 5.35  |
|    | Time           | 30.78 | 21.42 | 5.45  | 15.06 | 16.96 | 25.86 | 16.58 | 18.48 | 30.44 | 26.40 | 23.68 |        |       |       |
| 22 | Success / Fail | F     | S     | S     | S     | S     | S     | S     | S     | S     | S     | S     | 90.91  | 27.27 | 8.74  |

|    |                |       |       |       |       |       |       |       |       |        |        |       |        |       |       |
|----|----------------|-------|-------|-------|-------|-------|-------|-------|-------|--------|--------|-------|--------|-------|-------|
|    | Time           | 19.58 | 34.18 | 21.60 | 24.29 | 22.96 | 48.84 | 20.84 | 30.59 | 20.79  | 23.02  | 25.60 |        |       |       |
| 23 | Success / Fail | S     | S     | S     | S     | S     | S     | S     | S     | S      | S      | S     | 100.00 | 31.35 | 7.64  |
|    | Time           | 47.36 | 30.82 | 29.15 | 27.42 | 37.66 | 36.24 | 23.27 | 26.32 | 37.81  | 21.66  | 27.18 |        |       |       |
| 24 | Success / Fail | S     | S     | S     | S     | F     | S     | S     | S     | S      | S      | S     | 90.91  | 25.05 | 10.58 |
|    | Time           | 22.59 | 27.25 | 11.96 | 49.95 | 9.69  | 17.78 | 21.42 | 8..72 | 28.98  | 23.74  | 21.78 |        |       |       |
| 25 | Success / Fail | S     | S     | F     | F     | S     | S     | S     | S     | S      | S      | S     | 81.82  | 62.99 | 26.13 |
|    | Time           | 34.63 | 43.81 | 23.81 | 37.01 | 78.46 | 46.22 | 49.23 | 84.98 | 117.51 | 52.45  | 59.60 |        |       |       |
| 26 | Success / Fail | S     | S     | S     | S     | S     | S     | S     | S     | S      | S      | S     | 100.00 | 31.35 | 12.57 |
|    | Time           | 34.57 | 34.18 | 50.88 | 57.91 | 27.50 | 22.00 | 17.85 | 22.07 | 28.04  | 27.07  | 22.74 |        |       |       |
| 27 | Success / Fail | F     | S     | S     | S     | S     | F     | S     | S     | F      | S      | S     | 72.73  | 25.19 | 7.65  |
|    | Time           | 17.93 | 20.54 | 24.45 | 36.00 | 19.37 | 40.22 | 19.61 | 25.87 | 14.76  | 37.62  | 18.06 |        |       |       |
| 28 | Success / Fail | S     | S     | S     | S     | S     | S     | S     | S     | S      | S      | S     | 100.00 | 29.63 | 12.16 |
|    | Time           | 30.62 | 16.76 | 19.23 | 22.64 | 36.39 | 23.17 | 26.75 | 26.10 | 59.93  | 39.83  | 24.56 |        |       |       |
| 29 | Success / Fail | F     | S     | F     | S     | S     | S     | S     | S     | S      | S      | S     | 81.82  | 43.69 | 26.25 |
|    | Time           | 22.81 | 31.50 | 15.03 | 27.14 | 26.22 | 44.18 | 54.65 | 43.63 | 27.51  | 108.57 | 29.77 |        |       |       |
| 30 | Success / Fail | S     | S     | S     | S     | S     | S     | S     | S     | S      | S      | S     | 100.00 | 30.00 | 13.05 |
|    | Time           | 25.70 | 57.38 | 24.85 | 52.66 | 22.67 | 26.83 | 17.55 | 34.01 | 23.76  | 21.45  | 23.14 |        |       |       |

**Table B** Detailed results of the ring transfer task when using the virtual vision platform in the novice group

| No. | Indicator      | Number of Ring |       |       |       |       |       |       |       |       |       |       | Success rate (%) | Time for transferring a ring |       |
|-----|----------------|----------------|-------|-------|-------|-------|-------|-------|-------|-------|-------|-------|------------------|------------------------------|-------|
|     |                | 1              | 2     | 3     | 4     | 5     | 6     | 7     | 8     | 9     | 10    | 11    |                  | Mean                         | SD    |
| 1   | Success / Fail | S              | F     | S     | S     | S     | F     | S     | S     | S     | S     | S     | 81.82            | 36.58                        | 17.92 |
|     | Time           | 59.68          | 25.80 | 14.91 | 54.30 | 19.11 | 34.67 | 20.61 | 60.32 | 41.34 | 27.82 | 31.13 |                  |                              |       |
| 2   | Success / Fail | S              | S     | S     | S     | S     | S     | S     | S     | F     | F     | F     | 72.73            | 60.25                        | 17.35 |
|     | Time           | 42.36          | 70.53 | 71.78 | 41.68 | 81.99 | 66.56 | 70.90 | 36.19 | 25.99 | 12.46 | 71.08 |                  |                              |       |
| 3   | Success / Fail | S              | S     | F     | S     | S     | F     | S     | S     | F     | S     | S     | 72.73            | 44.27                        | 12.15 |
|     | Time           | 34.09          | 36.19 | 31.20 | 44.68 | 28.56 | 49.00 | 61.48 | 39.97 | 27.26 | 61.27 | 47.93 |                  |                              |       |
| 4   | Success / Fail | S              | F     | S     | S     | S     | S     | S     | S     | S     | S     | S     | 90.91            | 41.93                        | 19.78 |
|     | Time           | 44.66          | 55.03 | 33.39 | 41.80 | 22.48 | 32.50 | 32.07 | 40.53 | 51.77 | 27.49 | 92.62 |                  |                              |       |
| 5   | Success / Fail | S              | S     | S     | S     | S     | S     | S     | S     | F     | S     | S     | 90.91            | 60.79                        | 19.13 |
|     | Time           | 39.70          | 69.33 | 34.79 | 45.94 | 59.88 | 51.15 | 99.16 | 77.09 | 90.50 | 66.70 | 64.19 |                  |                              |       |
| 6   | Success / Fail | S              | S     | F     | S     | S     | S     | S     | S     | S     | S     | S     | 90.91            | 38.55                        | 17.24 |
|     | Time           | 31.54          | 24.48 | 31.95 | 23.50 | 44.76 | 19.92 | 31.10 | 64.74 | 57.24 | 25.85 | 62.32 |                  |                              |       |
| 7   | Success / Fail | S              | F     | S     | S     | S     | S     | F     | S     | S     | S     | S     | 81.82            | 41.50                        | 6.16  |
|     | Time           | 35.98          | 53.55 | 46.25 | 41.78 | 46.91 | 29.33 | 17.50 | 49.15 | 44.34 | 39.24 | 40.48 |                  |                              |       |
| 8   | Success / Fail | F              | S     | S     | S     | S     | S     | S     | S     | F     | S     | S     | 81.82            | 34.40                        | 13.51 |
|     | Time           | 69.44          | 29.63 | 27.15 | 64.37 | 31.35 | 29.29 | 16.43 | 41.29 | 7.52  | 28.75 | 41.34 |                  |                              |       |
| 9   | Success / Fail | S              | S     | S     | S     | S     | S     | S     | S     | S     | F     | S     | 90.91            | 28.77                        | 6.44  |
|     | Time           | 23.09          | 28.49 | 25.35 | 41.58 | 23.66 | 32.24 | 22.75 | 22.65 | 34.04 | 21.30 | 33.82 |                  |                              |       |
| 10  | Success / Fail | S              | S     | S     | S     | S     | S     | F     | F     | S     | S     | F     | 72.73            | 36.44                        | 7.47  |
|     | Time           | 28.34          | 25.23 | 43.50 | 35.90 | 44.04 | 35.55 | 17.65 | 74.22 | 33.43 | 45.50 | 35.12 |                  |                              |       |
| 11  | Success / Fail | S              | S     | S     | S     | S     | S     | S     | S     | S     | S     | S     | 100.00           | 28.76                        | 12.73 |

|    |                |       |       |       |       |       |       |       |       |       |       |       |        |       |       |
|----|----------------|-------|-------|-------|-------|-------|-------|-------|-------|-------|-------|-------|--------|-------|-------|
|    | Time           | 24.93 | 15.50 | 37.40 | 27.12 | 15.78 | 40.60 | 18.52 | 18.50 | 57.21 | 33.58 | 27.24 |        |       |       |
| 12 | Success / Fail | S     | F     | S     | S     | S     | F     | S     | S     | S     | S     | S     | 81.82  | 39.21 | 13.61 |
|    | Time           | 24.96 | 28.51 | 30.41 | 37.30 | 25.47 | 31.91 | 44.20 | 60.70 | 35.01 | 61.02 | 33.83 |        |       |       |
| 13 | Success / Fail | S     | S     | S     | F     | S     | S     | F     | S     | S     | S     | S     | 81.82  | 32.09 | 13.69 |
|    | Time           | 34.65 | 64.99 | 33.84 | 19.65 | 19.52 | 26.13 | 36.93 | 33.19 | 32.56 | 19.98 | 23.92 |        |       |       |
| 14 | Success / Fail | S     | F     | F     | S     | S     | S     | S     | S     | S     | S     | S     | 81.82  | 28.25 | 8.01  |
|    | Time           | 16.97 | 25.62 | 18.10 | 37.81 | 16.33 | 29.93 | 26.30 | 34.48 | 25.45 | 38.17 | 28.80 |        |       |       |
| 15 | Success / Fail | S     | S     | S     | S     | S     | S     | S     | S     | S     | F     | S     | 90.91  | 33.88 | 14.46 |
|    | Time           | 16.84 | 17.47 | 33.22 | 37.32 | 45.10 | 29.80 | 29.05 | 31.13 | 31.34 | 14.10 | 67.48 |        |       |       |
| 16 | Success / Fail | S     | S     | S     | S     | S     | S     | S     | S     | S     | F     | S     | 90.91  | 58.42 | 9.45  |
|    | Time           | 52.73 | 46.79 | 50.67 | 55.85 | 74.59 | 61.93 | 67.34 | 66.54 | 61.22 | 74.78 | 46.49 |        |       |       |
| 17 | Success / Fail | F     | S     | S     | S     | F     | S     | S     | S     | S     | S     | S     | 81.82  | 33.01 | 7.81  |
|    | Time           | 45.29 | 33.11 | 29.67 | 26.25 | 35.98 | 39.79 | 43.36 | 25.39 | 27.01 | 45.29 | 27.20 |        |       |       |
| 18 | Success / Fail | S     | S     | S     | S     | S     | S     | S     | S     | S     | S     | F     | 90.91  | 32.89 | 6.68  |
|    | Time           | 38.72 | 36.75 | 27.24 | 40.18 | 27.38 | 35.53 | 19.64 | 36.67 | 28.87 | 37.87 | 13.50 |        |       |       |
| 19 | Success / Fail | S     | F     | S     | S     | S     | S     | S     | S     | S     | S     | S     | 90.91  | 32.15 | 9.00  |
|    | Time           | 38.28 | 15.57 | 34.38 | 33.82 | 45.18 | 20.50 | 15.87 | 32.35 | 27.52 | 41.71 | 31.89 |        |       |       |
| 20 | Success / Fail | S     | S     | S     | S     | S     | S     | S     | S     | F     | S     | F     | 81.82  | 53.05 | 13.04 |
|    | Time           | 54.03 | 50.80 | 47.42 | 67.70 | 43.91 | 76.42 | 33.44 | 45.08 | 84.62 | 58.62 | 14.74 |        |       |       |
| 21 | Success / Fail | S     | S     | S     | S     | S     | F     | F     | S     | S     | S     | S     | 81.82  | 28.69 | 6.13  |
|    | Time           | 28.30 | 25.96 | 25.65 | 37.82 | 26.81 | 6.14  | 25.19 | 30.38 | 22.22 | 22.03 | 39.05 |        |       |       |
| 22 | Success / Fail | F     | S     | S     | S     | S     | S     | F     | S     | F     | S     | S     | 72.73  | 46.06 | 18.04 |
|    | Time           | 34.57 | 44.56 | 34.95 | 21.98 | 51.24 | 33.32 | 43.68 | 43.78 | 19.05 | 57.18 | 81.48 |        |       |       |
| 23 | Success / Fail | S     | S     | S     | S     | S     | S     | S     | S     | S     | S     | S     | 100.00 | 32.65 | 19.17 |
|    | Time           | 31.10 | 39.57 | 31.43 | 21.36 | 32.41 | 20.83 | 19.79 | 25.98 | 27.79 | 87.41 | 21.50 |        |       |       |

|    |                |       |       |        |       |       |       |       |       |       |       |        |        |       |       |
|----|----------------|-------|-------|--------|-------|-------|-------|-------|-------|-------|-------|--------|--------|-------|-------|
| 24 | Success / Fail | S     | S     | S      | S     | S     | S     | S     | S     | S     | S     | S      | 100.00 | 27.20 | 10.92 |
|    | Time           | 42.00 | 15.74 | 20.55  | 30.03 | 49.61 | 28.35 | 19.54 | 19.42 | 23.25 | 33.82 | 16.85  |        |       |       |
| 25 | Success / Fail | S     | S     | S      | S     | S     | S     | S     | S     | S     | S     | S      | 100.00 | 77.81 | 21.26 |
|    | Time           | 52.35 | 56.38 | 111.65 | 64.28 | 65.75 | 88.26 | 92.27 | 68.04 | 69.06 | 72.35 | 115.48 |        |       |       |
| 26 | Success / Fail | S     | S     | S      | S     | S     | S     | S     | S     | S     | S     | S      | 100.00 | 43.96 | 12.01 |
|    | Time           | 65.12 | 48.47 | 33.97  | 30.57 | 47.03 | 37.7  | 64.75 | 43.07 | 33.38 | 45.47 | 33.98  |        |       |       |
| 27 | Success / Fail | F     | S     | S      | S     | S     | S     | S     | S     | S     | S     | S      | 90.91  | 19.96 | 8.77  |
|    | Time           | 5.67  | 14.93 | 13.67  | 22.3  | 36.71 | 34.69 | 17.05 | 18.63 | 14.87 | 13.73 | 12.98  |        |       |       |
| 28 | Success / Fail | S     | S     | S      | S     | S     | S     | S     | S     | S     | S     | S      | 100.00 | 33.78 | 8.65  |
|    | Time           | 23.74 | 25.18 | 25.07  | 41.49 | 51.3  | 41.26 | 29.92 | 27.86 | 32.29 | 34.99 | 38.46  |        |       |       |
| 29 | Success / Fail | S     | S     | S      | S     | S     | F     | S     | S     | S     | S     | S      | 90.91  | 43.64 | 16.15 |
|    | Time           | 59.84 | 25.96 | 58.31  | 28.32 | 31.49 | 10.98 | 75.33 | 31.61 | 40.4  | 45.14 | 40.03  |        |       |       |
| 30 | Success / Fail | S     | S     | F      | S     | S     | S     | S     | S     | S     | S     | S      | 90.91  | 49.20 | 18.16 |
|    | Time           | 43.01 | 44.41 | 21.02  | 47.29 | 35.13 | 38.91 | 98.17 | 51.12 | 35.50 | 51.58 | 46.83  |        |       |       |

**Table C** Detailed results of the ring transfer task when using the stereo viewer in the surgeon group

| No. | Indicator      | Number of Ring |       |       |       |       |       |       |       |       |       |       | Success rate (%) | Time for transferring a ring |       |
|-----|----------------|----------------|-------|-------|-------|-------|-------|-------|-------|-------|-------|-------|------------------|------------------------------|-------|
|     |                | 1              | 2     | 3     | 4     | 5     | 6     | 7     | 8     | 9     | 10    | 11    |                  | Mean                         | SD    |
| 1   | Success / Fail | S              | S     | S     | S     | S     | S     | F     | S     | S     | S     | F     | 81.82            | 23.21                        | 7.21  |
|     | Time           | 26.22          | 21.92 | 17.69 | 22.41 | 25.46 | 40.06 | 16.06 | 20.94 | 15.43 | 18.78 | 6.97  |                  |                              |       |
| 2   | Success / Fail | S              | S     | S     | S     | S     | S     | S     | S     | S     | S     | S     | 100.00           | 23.93                        | 13.82 |
|     | Time           | 14.89          | 26.18 | 13.24 | 61.13 | 21.87 | 19.70 | 16.53 | 12.26 | 17.94 | 31.80 | 27.74 |                  |                              |       |
| 3   | Success / Fail | S              | S     | S     | S     | S     | S     | S     | S     | S     | F     | S     | 90.91            | 31.05                        | 11.57 |
|     | Time           | 32.13          | 33.46 | 25.32 | 24.66 | 25.29 | 24.68 | 17.78 | 33.75 | 60.43 | 12.14 | 33.02 |                  |                              |       |
| 4   | Success / Fail | S              | S     | S     | F     | F     | S     | S     | F     | S     | S     | S     | 72.73            | 18.82                        | 4.07  |
|     | Time           | 20.40          | 19.48 | 14.53 | 8.59  | 20.22 | 26.93 | 20.09 | 16.46 | 16.91 | 13.98 | 18.23 |                  |                              |       |
| 5   | Success / Fail | S              | F     | F     | S     | S     | S     | S     | S     | S     | S     | S     | 81.82            | 27.66                        | 14.08 |
|     | Time           | 62.99          | 19.07 | 21.81 | 24.34 | 20.49 | 20.87 | 16.80 | 29.91 | 23.41 | 18.93 | 31.22 |                  |                              |       |
| 6   | Success / Fail | S              | F     | S     | S     | S     | S     | S     | S     | S     | S     | S     | 90.91            | 27.32                        | 7.12  |
|     | Time           | 36.74          | 30.59 | 28.83 | 31.95 | 27.94 | 24.59 | 21.79 | 20.02 | 21.52 | 40.03 | 19.74 |                  |                              |       |
| 7   | Success / Fail | S              | S     | S     | S     | S     | S     | S     | F     | F     | S     | S     | 81.82            | 40.49                        | 24.40 |
|     | Time           | 104.49         | 34.59 | 30.04 | 30.59 | 37.94 | 28.90 | 40.65 | 12.81 | 18.68 | 28.22 | 29.00 |                  |                              |       |
| 8   | Success / Fail | S              | S     | S     | S     | S     | S     | S     | S     | F     | S     | S     | 90.91            | 25.88                        | 4.42  |
|     | Time           | 23.18          | 36.77 | 20.40 | 27.50 | 25.30 | 24.42 | 23.75 | 24.13 | 22.74 | 24.96 | 28.41 |                  |                              |       |
| 9   | Success / Fail | F              | F     | S     | S     | F     | F     | S     | S     | S     | F     | F     | 45.45            | 34.68                        | 10.46 |
|     | Time           | 18.73          | 31.09 | 47.89 | 28.32 | 14.57 | 36.67 | 33.06 | 21.90 | 42.23 | 20.94 | 34.35 |                  |                              |       |
| 10  | Success / Fail | S              | S     | S     | S     | S     | S     | S     | S     | S     | S     | S     | 100.00           | 18.75                        | 3.12  |
|     | Time           | 20.95          | 18.52 | 15.91 | 17.10 | 19.31 | 23.19 | 14.97 | 23.67 | 16.56 | 20.97 | 15.05 |                  |                              |       |
| 11  | Success / Fail | S              | S     | S     | S     | S     | S     | S     | F     | S     | S     | S     | 90.91            | 20.27                        | 4.90  |

|    |                |       |       |       |        |       |       |       |       |       |       |       |        |       |       |
|----|----------------|-------|-------|-------|--------|-------|-------|-------|-------|-------|-------|-------|--------|-------|-------|
|    | Time           | 16.91 | 18.69 | 27.16 | 16.64  | 17.87 | 19.98 | 14.14 | 8.51  | 30.16 | 21.04 | 20.09 |        |       |       |
| 12 | Success / Fail | S     | S     | S     | S      | S     | S     | S     | S     | S     | S     | S     | 100.00 | 21.41 | 3.95  |
|    | Time           | 24.93 | 27.41 | 19.06 | 18.60  | 25.67 | 16.59 | 24.01 | 19.94 | 15.59 | 19.68 | 24.07 |        |       |       |
| 13 | Success / Fail | S     | S     | S     | S      | S     | S     | S     | S     | S     | S     | S     | 100.00 | 21.27 | 4.66  |
|    | Time           | 22.98 | 29.61 | 13.46 | 17.97  | 27.36 | 17.31 | 22.70 | 22.70 | 20.43 | 17.46 | 21.97 |        |       |       |
| 14 | Success / Fail | F     | F     | S     | S      | S     | S     | S     | S     | F     | S     | S     | 72.73  | 46.86 | 26.32 |
|    | Time           | 43.59 | 31.07 | 58.10 | 103.29 | 41.69 | 22.35 | 56.26 | 28.79 | 35.12 | 26.35 | 38.07 |        |       |       |
| 15 | Success / Fail | S     | S     | S     | F      | S     | S     | S     | S     | S     | S     | S     | 90.91  | 24.45 | 8.49  |
|    | Time           | 19.49 | 34.92 | 13.17 | 10.87  | 23.89 | 40.44 | 26.62 | 13.37 | 23.87 | 22.99 | 25.72 |        |       |       |
| 16 | Success / Fail | F     | S     | S     | S      | F     | S     | F     | S     | S     | S     | S     | 72.73  | 18.32 | 3.97  |
|    | Time           | 16.49 | 14.18 | 11.81 | 20.86  | 14.48 | 19.50 | 19.10 | 20.67 | 17.98 | 24.34 | 17.18 |        |       |       |
| 17 | Success / Fail | S     | S     | S     | S      | S     | S     | S     | S     | S     | S     | S     | 100.00 | 36.48 | 15.25 |
|    | Time           | 43.93 | 32.02 | 27.04 | 44.76  | 75.86 | 35.51 | 34.04 | 18.07 | 34.30 | 23.30 | 32.48 |        |       |       |
| 18 | Success / Fail | S     | S     | S     | S      | S     | F     | S     | S     | F     | S     | S     | 81.82  | 32.85 | 16.82 |
|    | Time           | 55.90 | 26.88 | 23.77 | 26.34  | 15.46 | 12.17 | 17.63 | 54.94 | 1.70  | 21.45 | 53.31 |        |       |       |
| 19 | Success / Fail | S     | S     | S     | S      | S     | S     | S     | S     | S     | S     | F     | 90.91  | 21.90 | 4.20  |
|    | Time           | 20.96 | 23.20 | 24.65 | 26.61  | 16.48 | 15.88 | 22.18 | 27.30 | 17.01 | 24.73 | 6.93  |        |       |       |
| 20 | Success / Fail | S     | S     | S     | S      | S     | S     | S     | S     | S     | S     | S     | 100.00 | 15.88 | 3.95  |
|    | Time           | 15.40 | 10.94 | 14.07 | 12.93  | 11.74 | 15.35 | 23.66 | 13.00 | 19.53 | 19.14 | 18.96 |        |       |       |
| 21 | Success / Fail | S     | S     | S     | S      | S     | S     | S     | S     | S     | S     | S     | 100.00 | 25.15 | 9.77  |
|    | Time           | 25.62 | 21.00 | 48.43 | 29.74  | 36.48 | 17.54 | 19.58 | 17.30 | 16.36 | 23.26 | 21.29 |        |       |       |
| 22 | Success / Fail | S     | S     | S     | S      | S     | S     | S     | S     | S     | S     | S     | 100.00 | 15.86 | 3.20  |
|    | Time           | 13.39 | 17.31 | 15.47 | 13.20  | 11.04 | 14.20 | 17.50 | 18.29 | 21.43 | 13.06 | 19.57 |        |       |       |
| 23 | Success / Fail | S     | S     | S     | S      | S     | S     | S     | S     | S     | S     | S     | 100.00 | 18.24 | 4.99  |
|    | Time           | 20.90 | 15.42 | 11.14 | 22.74  | 16.77 | 11.32 | 20.50 | 13.59 | 22.15 | 19.54 | 26.59 |        |       |       |



**Table D** Detailed results of the ring transfer task when using the virtual vision platform in the surgeon group

| No. | Indicator      | Number of Ring |       |       |       |       |       |       |        |       |       |       | Success rate (%) | Time for transferring a ring |       |
|-----|----------------|----------------|-------|-------|-------|-------|-------|-------|--------|-------|-------|-------|------------------|------------------------------|-------|
|     |                | 1              | 2     | 3     | 4     | 5     | 6     | 7     | 8      | 9     | 10    | 11    |                  | Mean                         | SD    |
| 1   | Success / Fail | S              | S     | S     | S     | F     | S     | S     | S      | S     | S     | S     | 90.91            | 26.84                        | 12.74 |
|     | Time           | 54.22          | 40.12 | 20.62 | 13.99 | 14.65 | 23.19 | 15.91 | 36.77  | 19.76 | 21.86 | 21.94 |                  |                              |       |
| 2   | Success / Fail | S              | S     | S     | S     | S     | S     | S     | S      | S     | S     | S     | 100.00           | 26.94                        | 10.08 |
|     | Time           | 25.82          | 51.37 | 38.14 | 31.27 | 23.09 | 19.50 | 15.56 | 24.84  | 21.30 | 23.99 | 21.45 |                  |                              |       |
| 3   | Success / Fail | S              | S     | S     | S     | S     | S     | S     | S      | S     | S     | F     | 90.91            | 38.95                        | 10.71 |
|     | Time           | 51.44          | 38.70 | 60.67 | 25.72 | 44.51 | 38.08 | 34.88 | 29.30  | 29.89 | 36.32 | 36.27 |                  |                              |       |
| 4   | Success / Fail | S              | S     | S     | S     | F     | F     | S     | F      | F     | S     | F     | 54.55            | 33.19                        | 12.89 |
|     | Time           | 17.06          | 19.58 | 40.55 | 47.35 | 12.10 | 19.84 | 30.34 | 117.38 | 33.83 | 44.26 | 22.23 |                  |                              |       |
| 5   | Success / Fail | S              | S     | S     | S     | S     | S     | S     | S      | S     | S     | S     | 100.00           | 26.69                        | 8.17  |
|     | Time           | 29.76          | 35.56 | 20.86 | 41.18 | 22.96 | 31.93 | 33.99 | 18.13  | 21.84 | 21.65 | 15.78 |                  |                              |       |
| 6   | Success / Fail | S              | S     | S     | S     | S     | S     | S     | S      | F     | S     | S     | 90.91            | 35.53                        | 11.58 |
|     | Time           | 30.21          | 51.14 | 53.54 | 25.58 | 20.72 | 38.95 | 31.00 | 45.09  | 24.67 | 36.50 | 22.59 |                  |                              |       |
| 7   | Success / Fail | F              | S     | S     | S     | S     | S     | S     | S      | F     | F     | S     | 72.73            | 44.12                        | 15.80 |
|     | Time           | 59.37          | 42.23 | 38.03 | 43.35 | 27.16 | 27.30 | 75.78 | 43.43  | 39.35 | 58.80 | 55.64 |                  |                              |       |
| 8   | Success / Fail | S              | S     | S     | S     | S     | S     | S     | S      | S     | S     | S     | 100.00           | 39.54                        | 4.70  |
|     | Time           | 31.84          | 42.63 | 36.02 | 37.32 | 40.82 | 37.74 | 36.00 | 44.42  | 38.50 | 46.39 | 44.57 |                  |                              |       |
| 9   | Success / Fail | F              | S     | F     | F     | F     | S     | S     | S      | S     | S     | S     | 63.64            | 35.13                        | 10.33 |
|     | Time           | 18.41          | 35.12 | 9.35  | 26.38 | 81.88 | 34.51 | 35.63 | 53.87  | 37.34 | 30.50 | 18.94 |                  |                              |       |
| 10  | Success / Fail | S              | S     | S     | S     | S     | S     | F     | S      | S     | S     | S     | 90.91            | 20.59                        | 8.80  |
|     | Time           | 16.54          | 17.96 | 16.86 | 17.32 | 12.52 | 28.36 | 8.56  | 12.19  | 22.79 | 19.60 | 41.75 |                  |                              |       |
| 11  | Success / Fail | S              | S     | S     | S     | S     | S     | F     | S      | S     | S     | S     | 90.91            | 22.49                        | 6.03  |

|    |                |       |       |       |       |       |       |       |       |       |       |       |        |       |       |
|----|----------------|-------|-------|-------|-------|-------|-------|-------|-------|-------|-------|-------|--------|-------|-------|
|    | Time           | 23.41 | 20.38 | 24.67 | 28.23 | 17.18 | 14.32 | 15.88 | 14.88 | 31.07 | 20.81 | 29.90 |        |       |       |
| 12 | Success / Fail | S     | S     | S     | S     | S     | S     | S     | S     | S     | S     | S     | 100.00 | 28.74 | 10.54 |
|    | Time           | 34.04 | 21.75 | 17.19 | 22.55 | 38.62 | 33.08 | 18.68 | 30.78 | 17.14 | 31.18 | 51.10 |        |       |       |
| 13 | Success / Fail | S     | S     | S     | F     | S     | S     | S     | S     | S     | S     | S     | 90.91  | 20.41 | 2.88  |
|    | Time           | 19.27 | 20.46 | 15.87 | 6.96  | 26.33 | 19.08 | 19.65 | 20.55 | 18.90 | 24.02 | 19.98 |        |       |       |
| 14 | Success / Fail | S     | S     | S     | S     | S     | S     | S     | S     | S     | S     | S     | 100.00 | 35.12 | 7.86  |
|    | Time           | 48.86 | 35.24 | 27.26 | 42.14 | 35.37 | 31.86 | 20.09 | 43.02 | 35.87 | 30.96 | 35.69 |        |       |       |
| 15 | Success / Fail | S     | S     | S     | S     | S     | S     | S     | S     | S     | S     | S     | 100.00 | 27.95 | 12.88 |
|    | Time           | 28.19 | 31.21 | 18.44 | 20.67 | 18.39 | 58.79 | 18.19 | 25.69 | 20.39 | 22.85 | 44.61 |        |       |       |
| 16 | Success / Fail | S     | S     | S     | S     | S     | S     | S     | S     | S     | S     | F     | 90.91  | 23.88 | 5.28  |
|    | Time           | 13.57 | 26.01 | 20.87 | 30.88 | 26.67 | 26.34 | 16.65 | 26.30 | 24.41 | 27.06 | 39.82 |        |       |       |
| 17 | Success / Fail | S     | F     | S     | F     | S     | S     | F     | S     | S     | S     | S     | 72.73  | 29.89 | 15.11 |
|    | Time           | 20.18 | 35.79 | 65.36 | 26.30 | 25.42 | 29.54 | 11.13 | 24.86 | 30.96 | 26.68 | 16.15 |        |       |       |
| 18 | Success / Fail | S     | F     | S     | S     | F     | S     | S     | S     | S     | S     | S     | 81.82  | 25.80 | 10.58 |
|    | Time           | 31.30 | 31.39 | 17.23 | 22.34 | 13.09 | 50.49 | 19.33 | 18.90 | 30.84 | 18.98 | 22.78 |        |       |       |
| 19 | Success / Fail | F     | S     | S     | S     | F     | S     | S     | S     | S     | S     | S     | 81.82  | 31.59 | 14.98 |
|    | Time           | 10.88 | 20.73 | 20.18 | 29.30 | 39.74 | 32.10 | 26.05 | 57.83 | 55.62 | 25.19 | 17.27 |        |       |       |
| 20 | Success / Fail | S     | S     | S     | S     | S     | S     | S     | S     | F     | S     | F     | 81.82  | 20.65 | 9.58  |
|    | Time           | 15.91 | 37.06 | 11.27 | 16.87 | 18.40 | 14.11 | 19.28 | 15.90 | 7.43  | 37.01 | 12.38 |        |       |       |
| 21 | Success / Fail | S     | S     | S     | S     | S     | S     | S     | S     | S     | S     | S     | 100.00 | 23.54 | 6.19  |
|    | Time           | 24.59 | 28.48 | 18.83 | 17.34 | 36.69 | 21.06 | 30.00 | 25.19 | 18.05 | 21.42 | 17.26 |        |       |       |
| 22 | Success / Fail | S     | S     | S     | S     | S     | F     | S     | F     | S     | S     | S     | 81.82  | 33.00 | 10.16 |
|    | Time           | 22.47 | 34.62 | 28.43 | 30.14 | 39.78 | 8.79  | 22.58 | 25.64 | 55.30 | 28.09 | 35.58 |        |       |       |
| 23 | Success / Fail | S     | S     | S     | S     | S     | S     | S     | S     | S     | S     | S     | 100.00 | 22.08 | 4.02  |
|    | Time           | 15.98 | 29.94 | 25.43 | 26.96 | 21.34 | 21.28 | 22.31 | 21.73 | 18.82 | 18.37 | 20.72 |        |       |       |

**Table E** Detailed results of the time for performing the scenarios when using the stereo viewer (DVC: DICOM viewer check, VSC: vital sign check)

| Participant No. | Novice |       |       |       | Surgeon |       |       |       |
|-----------------|--------|-------|-------|-------|---------|-------|-------|-------|
|                 | DVC    | VSC   | Mean  | SD    | DVC     | VSC   | Mean  | SD    |
| 1               | 33.10  | 25.20 | 29.15 | 5.59  | 27.92   | 18.37 | 23.15 | 6.75  |
| 2               | 31.78  | 30.70 | 31.24 | 0.76  | 26.82   | 16.82 | 21.82 | 7.07  |
| 3               | 26.77  | 16.58 | 21.68 | 7.21  | 33.46   | 17.35 | 25.41 | 11.39 |
| 4               | 31.29  | 18.03 | 24.66 | 9.38  | 29.38   | 18.40 | 23.89 | 7.76  |
| 5               | 27.00  | 16.43 | 21.72 | 7.47  | 28.71   | 16.05 | 22.38 | 8.95  |
| 6               | 26.42  | 15.79 | 21.11 | 7.52  | 29.58   | 17.67 | 23.63 | 8.42  |
| 7               | 28.12  | 15.52 | 21.82 | 8.91  | 28.30   | 20.59 | 24.45 | 5.45  |
| 8               | 29.82  | 15.60 | 22.71 | 10.06 | 27.29   | 17.57 | 22.43 | 6.87  |
| 9               | 29.87  | 17.10 | 23.49 | 9.03  | 26.74   | 17.46 | 22.10 | 6.56  |
| 10              | 28.50  | 19.60 | 24.05 | 6.29  | 27.90   | 16.51 | 22.21 | 8.05  |
| 11              | 25.59  | 15.90 | 20.75 | 6.85  | 29.93   | 17.67 | 23.80 | 8.67  |
| 12              | 28.81  | 17.78 | 23.30 | 7.80  | 27.46   | 22.78 | 25.12 | 3.31  |
| 13              | 27.73  | 18.48 | 23.11 | 6.54  | 26.10   | 17.37 | 21.74 | 6.17  |
| 14              | 29.34  | 16.71 | 23.03 | 8.93  | 28.06   | 17.44 | 22.75 | 7.51  |
| 15              | 28.75  | 17.63 | 23.19 | 7.86  | 25.81   | 18.06 | 21.94 | 5.48  |
| 16              | 27.59  | 17.06 | 22.33 | 7.45  | 27.59   | 17.09 | 22.34 | 7.42  |
| 17              | 28.01  | 18.42 | 23.22 | 6.78  | 25.67   | 17.17 | 21.42 | 6.01  |
| 18              | 25.31  | 16.67 | 20.99 | 6.11  | 28.20   | 16.07 | 22.14 | 8.58  |
| 19              | 27.83  | 16.23 | 22.03 | 8.20  | 27.11   | 17.09 | 22.10 | 7.09  |
| 20              | 21.89  | 15.08 | 18.49 | 4.82  | 26.10   | 18.08 | 22.09 | 5.67  |
| 21              | 27.10  | 16.88 | 21.99 | 7.23  | 28.79   | 17.54 | 23.17 | 7.95  |

|    |       |       |       |      |       |       |       |      |
|----|-------|-------|-------|------|-------|-------|-------|------|
| 22 | 28.00 | 17.62 | 22.81 | 7.34 | 26.05 | 17.40 | 21.73 | 6.12 |
| 23 | 29.43 | 18.26 | 23.85 | 7.90 | 27.03 | 16.69 | 21.86 | 7.31 |
| 24 | 29.97 | 16.14 | 23.06 | 9.78 |       |       |       |      |
| 25 | 27.30 | 15.98 | 21.64 | 8.00 |       |       |       |      |
| 26 | 31.04 | 17.66 | 24.35 | 9.46 |       |       |       |      |
| 27 | 26.26 | 17.01 | 21.64 | 6.54 |       |       |       |      |
| 28 | 26.92 | 18.66 | 22.79 | 5.84 |       |       |       |      |
| 29 | 26.94 | 17.50 | 22.22 | 6.68 |       |       |       |      |
| 30 | 27.95 | 17.39 | 22.67 | 7.47 |       |       |       |      |

**Table F** Detailed results of the time for performing the scenarios when using the virtual vision platform (DVC: DICOM viewer check, VSC: vital sign check)

| Participant No. | Novice |       |       |       | Surgeon |       |       |       |
|-----------------|--------|-------|-------|-------|---------|-------|-------|-------|
|                 | DVC    | VSC   | Mean  | SD    | DVC     | VSC   | Mean  | SD    |
| 1               | 36.87  | 16.93 | 26.90 | 14.10 | 26.86   | 18.03 | 22.45 | 6.24  |
| 2               | 39.70  | 18.99 | 29.35 | 14.64 | 26.23   | 17.39 | 21.81 | 6.25  |
| 3               | 27.89  | 17.00 | 22.45 | 7.70  | 27.03   | 17.82 | 22.43 | 6.51  |
| 4               | 34.39  | 17.99 | 26.19 | 11.60 | 28.50   | 17.40 | 22.95 | 7.85  |
| 5               | 33.60  | 16.16 | 24.88 | 12.33 | 35.61   | 15.56 | 25.59 | 14.18 |
| 6               | 27.70  | 17.37 | 22.54 | 7.30  | 30.38   | 18.26 | 24.32 | 8.57  |
| 7               | 37.12  | 17.61 | 27.37 | 13.80 | 29.00   | 17.29 | 23.15 | 8.28  |
| 8               | 27.08  | 19.68 | 23.38 | 5.23  | 29.08   | 17.94 | 23.51 | 7.88  |
| 9               | 30.09  | 18.61 | 24.35 | 8.12  | 29.62   | 17.75 | 23.69 | 8.39  |
| 10              | 29.26  | 18.68 | 23.97 | 7.48  | 26.08   | 17.21 | 21.65 | 6.27  |
| 11              | 27.80  | 16.60 | 22.20 | 7.92  | 27.95   | 16.80 | 22.38 | 7.88  |
| 12              | 28.91  | 17.80 | 23.36 | 7.86  | 27.42   | 18.17 | 22.80 | 6.54  |
| 13              | 28.10  | 17.92 | 23.01 | 7.20  | 27.53   | 15.30 | 21.42 | 8.65  |
| 14              | 30.39  | 16.92 | 23.66 | 9.52  | 28.02   | 16.78 | 22.40 | 7.95  |
| 15              | 29.11  | 19.07 | 24.09 | 7.10  | 25.16   | 17.22 | 21.19 | 5.61  |
| 16              | 28.87  | 18.47 | 23.67 | 7.35  | 28.05   | 17.15 | 22.60 | 7.71  |
| 17              | 30.15  | 18.48 | 24.32 | 8.25  | 28.14   | 17.56 | 22.85 | 7.48  |
| 18              | 30.06  | 16.82 | 23.44 | 9.36  | 31.01   | 16.81 | 23.91 | 10.04 |
| 19              | 26.35  | 15.87 | 21.11 | 7.41  | 27.91   | 16.83 | 22.37 | 7.83  |
| 20              | 28.82  | 18.45 | 23.64 | 7.33  | 29.03   | 17.01 | 23.02 | 8.50  |
| 21              | 26.54  | 17.15 | 21.85 | 6.64  | 27.70   | 18.40 | 23.05 | 6.58  |

|    |       |       |       |      |       |       |       |      |
|----|-------|-------|-------|------|-------|-------|-------|------|
| 22 | 30.26 | 16.65 | 23.46 | 9.62 | 27.70 | 17.93 | 22.82 | 6.91 |
| 23 | 28.04 | 17.07 | 22.56 | 7.76 | 26.01 | 18.11 | 22.06 | 5.59 |
| 24 | 28.58 | 16.66 | 22.62 | 8.43 |       |       |       |      |
| 25 | 29.08 | 15.65 | 22.37 | 9.50 |       |       |       |      |
| 26 | 29.07 | 19.97 | 24.52 | 6.43 |       |       |       |      |
| 27 | 25.19 | 16.96 | 21.08 | 5.82 |       |       |       |      |
| 28 | 27.85 | 17.51 | 22.68 | 7.31 |       |       |       |      |
| 29 | 27.74 | 17.01 | 22.38 | 7.59 |       |       |       |      |
| 30 | 27.55 | 18.37 | 22.96 | 6.49 |       |       |       |      |
